# Supplementary material for: Whole-Body Biodistribution, Dosimetry, and Metabolite Correction of [11C]Palmitate: A PET Tracer for Imaging of Fatty Acid Metabolism
Source: PubMed Central journal article supplement — Mol Imaging. 2017 Oct 26;16:1536012117734485. doi: 10.1177/1536012117734485 (PMC5665104; doi:10.1177/1536012117734485), 2017-10-26
Supplement: Supplemental_figure.pdf [file Supplemental_figure.pdf]

**A****<sup>11</sup>C-Palmitate****Myocardium**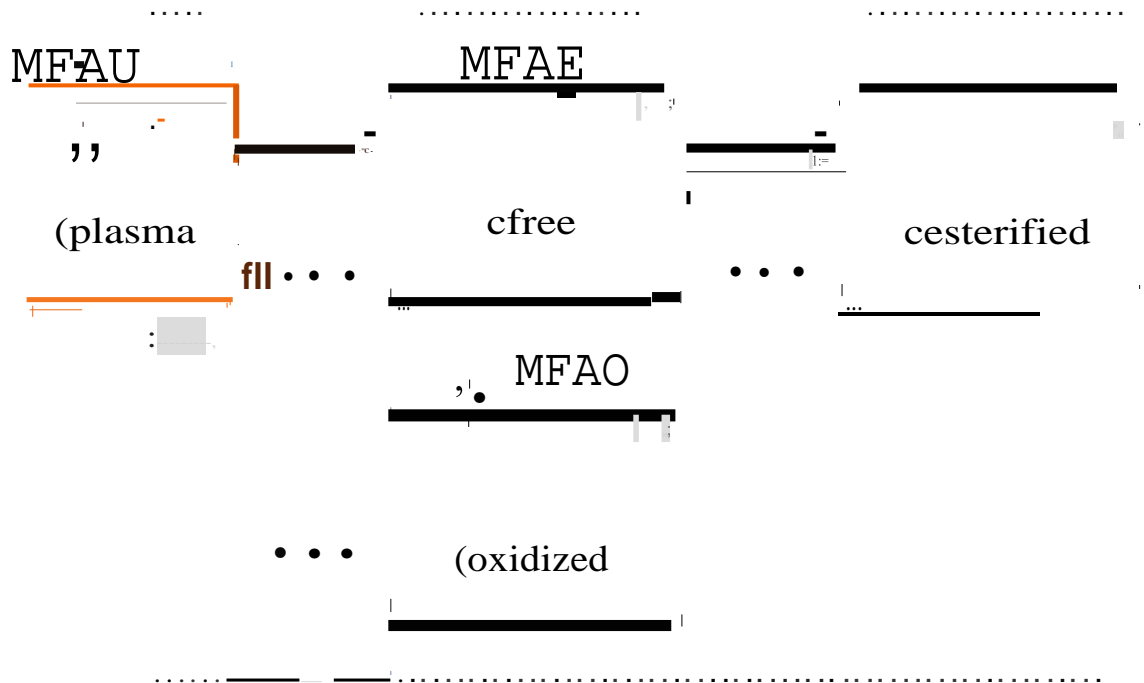**B**

$$MFAE = C_{NEFA} \frac{k_{p1} k_{12}}{k_{1p} + k_{12} + k_{13}}$$

$$MFAO = C_{NEFA} \frac{k_{p1} k_{13}}{k_{1p} + k_{12} + k_{13}}$$

$$MFAU = MFAE + MFAO$$

A: The three-tissue compartmental model proposed and validated by Bergmann et. al. MFAU = myocardial fatty acid uptake, MFAO, myocardial fatty acid oxidation, MFAE = myocardial fatty acid esterification. Bold arrows denote micro rate constants used in the equations depicted in panel B.
